# Supplementary material for: Personalized tissue-engineered veins – long term safety, functionality and cellular transcriptome analysis in large animals
Source: Royal Society of Chemistry journal article supplement (doi:10.1039/d2bm02011d), 2023-01-01
Supplement: d2bm02011d1.pdf [file d2bm02011d1.pdf]

**Supplementary Materials ” Personalized tissue-engineered veins – Long term safety, functionality  
and cellular transcriptome analysis in large animals “**

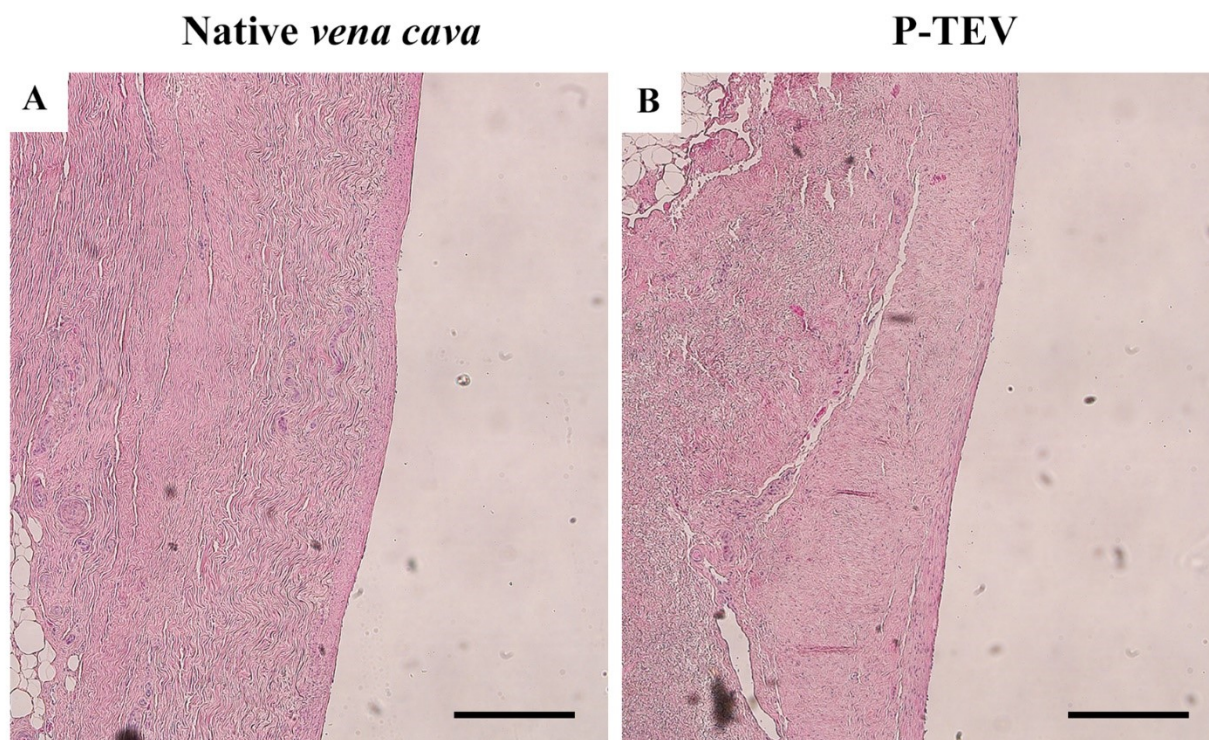

**Supplementary figure 1. Cellular morphology of native *vena cava* tissue and P-TEV on year  
after transplantation**

Low magnification tissue morphology illustrated with Hematoxylin and Eosin staining. A) Tissue from native *vena cava* shows the normal tissue morphology. B) Tissue morphology of P-TEV after 12 months *in vivo* Scale bars are 200  $\mu\text{m}$ .

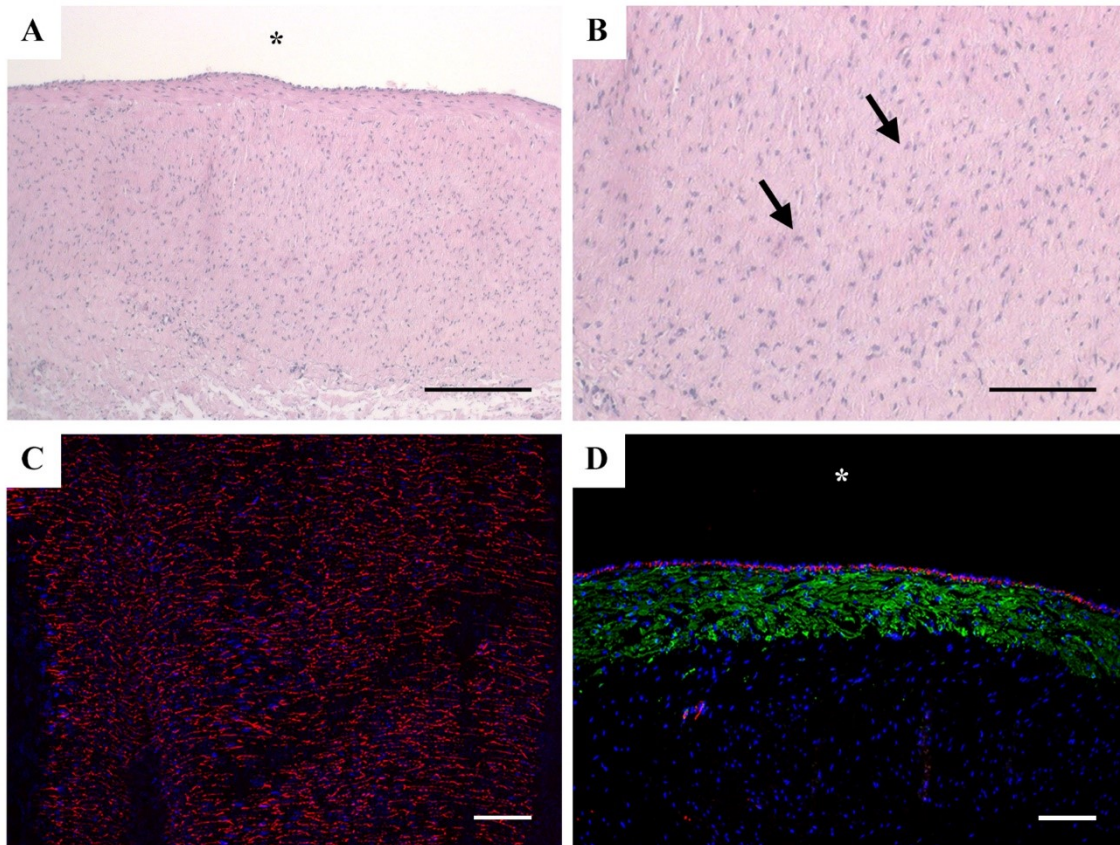

**Supplementary figure 2 Histology images of P-TEV 6 months after surgery in the GLP study.** A and B) Hematoxylin and Eosin staining showing the recellularized vein tissue. Arrows indicate cell nuclei. C) *En face* image of the luminal side of the graft with DAPI (blue) and antibody against CD31 (red). D) Antibodies against CD31 (red) and alpha smooth muscle actin (green), and DAPI (blue). \* = luminal side. Scale bars are 200  $\mu\text{m}$  in A; 50  $\mu\text{m}$  in B; 20  $\mu\text{m}$  in C and D.

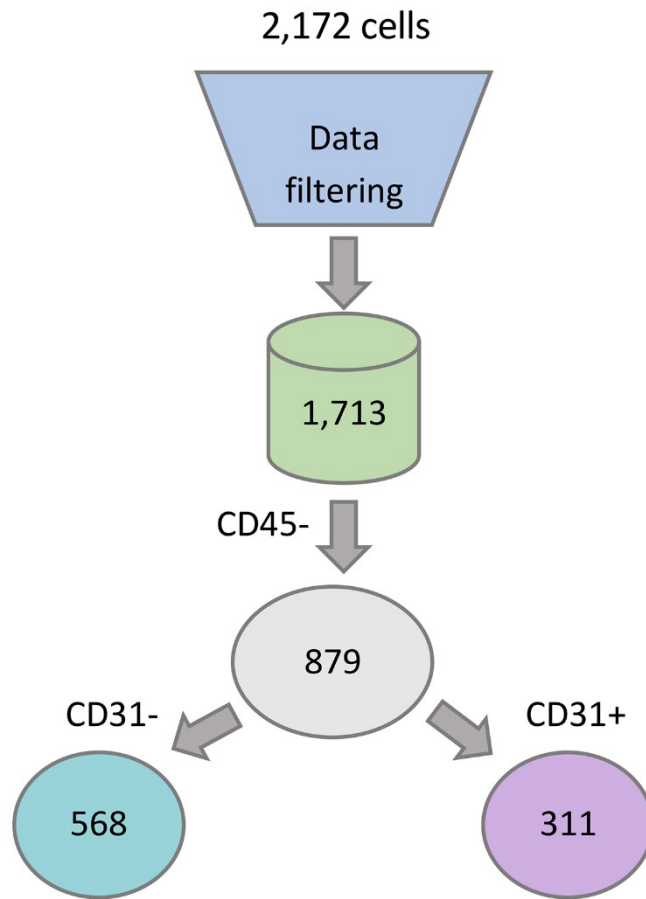

**Supplementary Figure 3. Filtering of cells for RNA sequencing data analysis.** Filtering of low-quality cells, blood cells and split into CD31 (PECAM) positive and negative cells for subsequent data analysis. The number of cells in each filtering step are shown in the figure.

**Supplementary table I**

| <b>Vessel Nr</b>           | <b>Luminal diameter (mm)</b> | <b>Graft length (cm)</b> |
|----------------------------|------------------------------|--------------------------|
| <b>Surgeries in Sweden</b> |                              |                          |
| <b>1</b>                   | 6.4                          | 2.5                      |
| <b>2</b>                   | 5.1                          | 2.5                      |
| <b>3</b>                   | 4.4-7.0                      | 2.3                      |
| <b>4</b>                   | 4.5                          | 2.5                      |
| <b>5</b>                   | 7.6                          | 2.5                      |
| <b>6</b>                   | 7.0                          | 3.0                      |
| <b>7</b>                   | 7.6                          | 2.5                      |
| <b>Surgeries in Spain</b>  |                              |                          |
| <b>1</b>                   | 5.1                          | 3.3                      |
| <b>2</b>                   | 4.5                          | 3.0                      |
| <b>3</b>                   | 6.4                          | 2.2                      |





FOXP1  
WTAP  
GJA1  
TXNRD1  
CSDE1  
LARP1  
missing: 14639  
missing: 15188  
missing: 15087  
missing: 7151  
missing: 15088  
missing: 12518  
missing: 3153  
RAMP2  
SELENOS  
RANBP1  
missing: 3573  
MT1X  
SRSF3  
ADGRG1  
missing: 4395  
EMP2  
LIMA1  
HNRNPA3  
missing: 13002  
PRSS23  
TSPAN12  
HSPA9  
TIMP1  
CLEC14A  
CDH5  
BTF3  
RHOJ  
RGS4  
STOM  
KTN1  
OLR1  
SRRM1  
TMED5  
DCLK1  
RHOB  
SGK1  
S0O2  
ADGRL4  
missing: 8035  
LMNA  
RNPS1  
NFKBIZ  
CLDN5  
missing: 2769  
CEBPZ  
RGS2  
S1PR1  
STX11  
COPS4  
AOPEP  
ITM2B  
ISG15  
EMP1  
missing: 13263  
FGF2  
MAFF  
SGCE  
GLT8O2  
PTGES  
LGALS3BP  
GMFB  
FAM180B

## Supplementary Table IV

## Gene names in heatmap, Figure 9C

NSA2  
PROX1  
missing:14549  
AXL  
EEF10  
RAB7A  
PRKAA1A  
PDIA3  
BUB3  
HNRNPA.3  
missing:14639  
missing:12517  
missing:15088  
missing:15188  
missing:12518  
missing:7151  
missing: 15087  
missing:12520  
missing:15324  
missing: 15236  
FGF2  
NCL  
SFPQ  
GSN  
missing: 10206  
EIF3J  
VIM  
C3  
missing:13263  
KLF4  
PTGS2  
FBLN1  
SERPINE1  
missing:1294  
AMCF-II  
S100A10  
BGN  
RPS3  
MT1X  
PGRMC1  
SOCBP  
IMP3  
missing: 13095  
SELENOM

MIS12  
TWF1  
F2RL2  
missing:7887  
COV3
